# Supplementary material for: A supplier selection model in pharmaceutical supply chain using PCA, Z-TOPSIS and MILP: A case study
Source: PubMed Central journal article supplement (PMC6093669; doi:10.1371/journal.pone.0201604), 2018-08-15
Supplement: pone.0201604.s002.pdf [file pone.0201604.s002.pdf]

## انتخاب تأمین کننده در زنجیره تأمین دارو

هدف از طراحی این پرسشنامه، بررسی میزان اهمیت معیارهایی است که شرکت های داروسازی جهت انتخاب شرکت های تأمین کننده در نظر می گیرند. مقتضی است درجه ی اهمیت هر یک از معیارهای ذکر شده را از 0 تا 10 مشخص نمایید.

### هزینه

1.

قیمت محصول

.Mark only one oval

10 9 8 7 6 5 4 3 2 1 0

بی اهمیت

2.

نحوه مطالبه و دریافت مبلغ قرارداد

.Mark only one oval

10 9 8 7 6 5 4 3 2 1 0

بی اهمیت

3.

هزینه حمل و نقل

.Mark only one oval

10 9 8 7 6 5 4 3 2 1 0

بی اهمیت

### کیفیت



## خدمات

9.

مدیریت ارتباط با مشتری

CRM

.Mark only one oval

10 9 8 7 6 5 4 3 2 1 0

بی اهمیت

10.

خدمات پس از فروش

.Mark only one oval

10 9 8 7 6 5 4 3 2 1 0

بی اهمیت

## تحويل

11.

فاصله مکانی تأمین کننده تا محل شرکت

.Mark only one oval

10 9 8 7 6 5 4 3 2 1 0

بی اهمیت

12.

تحويل به موقع

.Mark only one oval

10 9 8 7 6 5 4 3 2 1 0

بی اهمیت

ویژگی های تأمین کننده





22.

سیستم ارزیابی ریسک  
Mark only one oval

10 9 8 7 6 5 4 3 2 1 0

بی اهمیت

### منابع انسانی

23.

مهارت پرسنل  
Mark only one oval

10 9 8 7 6 5 4 3 2 1 0

بی اهمیت

24.

تجربه پرسنل  
Mark only one oval

10 9 8 7 6 5 4 3 2 1 0

بی اهمیت

### نظرات و پیشنهادات

25.

با تشکر از زمانی که صرف پاسخگویی به سوالات این پرسشنامه کردید. در صورتیکه در حین پاسخ با مشکل یا ابهامی مواجه شدید یا چنانچه اضافه نمودن معیاری ضرورت داشت، لطفاً بیان فرمایید.

\_\_\_\_\_  
\_\_\_\_\_  
\_\_\_\_\_  
\_\_\_\_\_  
\_\_\_\_\_
